# Supplementary material
Source: PubMed Central journal article supplement (PMC8921762)
Supplement: djab076_supplementary_data.pdf [file djab076_supplementary_data.pdf]

## SUPPLEMENTARY MATERIALS

### Supplementary Tables

**Supplementary Table 1: 56 loci associated with clinical melanoma used to calculate the PRS.**

| rsID               | Effect allele | Odds ratio     |
|--------------------|---------------|----------------|
| rs7412746          | C             | 0.9262         |
| rs76798800         | G             | 0.9048         |
| rs2695237          | T             | 1.1134         |
| rs1800440          | T             | 1.0943         |
| rs10931936         | T             | 1.0856         |
| rs149617956        | G             | 0.3503         |
| rs3950296          | C             | 1.0763         |
| rs2301293          | C             | 0.8933         |
| rs466502           | A             | 0.8586         |
| <i>rs16891982*</i> | <i>C*</i>     | <i>0.4617*</i> |
| rs11747245         | A             | 1.0703         |
| rs32578            | G             | 1.0973         |
| rs6914598          | T             | 0.9028         |
| rs16886790         | T             | 1.1094         |
| rs117132860        | G             | 0.6918         |
| rs1894765          | C             | 0.9136         |
| rs4731207          | G             | 0.924          |
| rs10090648         | G             | 0.9037         |
| rs13263376         | G             | 0.9244         |
| rs520015           | C             | 1.0637         |
| rs10960710         | G             | 0.9344         |
| rs871024           | C             | 1.192          |
| rs2811711          | T             | 1.1256         |
| rs55797833         | T             | 1.6087         |
| rs3217986          | T             | 0.8405         |
| rs72652478         | C             | 1.2513         |
| rs10739221         | T             | 1.1108         |
| rs1339759          | C             | 1.0983         |
| rs7902587          | C             | 0.8521         |
| rs4617548          | A             | 0.9382         |
| rs660963           | A             | 1.0981         |
| rs1126809          | G             | 0.8251         |
| rs1801516          | G             | 1.1715         |
| rs1861183          | A             | 0.9293         |

|             |   |        |
|-------------|---|--------|
| rs4763456   | T | 0.9201 |
| rs2300560   | C | 1.0711 |
| rs112761681 | A | 0.9027 |
| rs1278768   | G | 0.9364 |
| rs141514981 | C | 0.8252 |
| rs12913832  | A | 0.8817 |
| rs150962800 | C | 0.8016 |
| rs62034139  | G | 0.9065 |
| rs12597188  | G | 0.9234 |
| rs2911423   | C | 1.0745 |
| rs116927526 | C | 0.6017 |
| rs11649196  | G | 0.9101 |
| rs11538871  | C | 0.7204 |
| rs1805007   | C | 0.58   |
| rs1805009   | G | 0.6553 |
| rs78378222  | T | 0.7301 |
| rs77733715  | A | 0.659  |
| rs6059655   | A | 1.441  |
| rs143190905 | G | 1.1404 |
| rs35640778  | G | 1.3691 |
| rs443099    | G | 0.8806 |
| rs132941    | T | 1.1083 |

\* Variant did not pass imputation quality control and was not included in subsequent analysis.

**Supplementary Table 2. Participants distribution of melanoma events by polygenic risk score (PRS) group**

| Participants                           | No. of events in each PRS group |        |      |
|----------------------------------------|---------------------------------|--------|------|
|                                        | Low                             | Medium | High |
| Incident melanoma                      | 12                              | 57     | 29   |
| Incident melanoma + prevalent melanoma | 2                               | 7      | 13   |
| Incident melanoma - male               | 5                               | 38     | 18   |
| Incident melanoma - female             | 7                               | 19     | 11   |
| Prevalent melanoma - male              | 33                              | 151    | 77   |
| Prevalent melanoma - female            | 19                              | 141    | 107  |

**Supplementary Table 3: Logistic Regression model for prevalent melanoma at enrolment stratified by sex.**

|                | Male Participants        |          | Female Participants      |          |
|----------------|--------------------------|----------|--------------------------|----------|
|                | OR <sup>a</sup> (95% CI) | <i>P</i> | OR <sup>a</sup> (95% CI) | <i>P</i> |
| OR (per SD)    | 1.39 (1.23;1.57)         | <0.001   | 1.72 (1.53;1.94)         | <0.001   |
| Family History | 2.25 (1.19;3.91)         | 0.007    | 2.42 (1.49;3.76)         | <0.001   |

<sup>a</sup>Odds ratio (OR) as Continuous Variable (per standard deviation). CI = confidence interval.

## Supplementary Figures

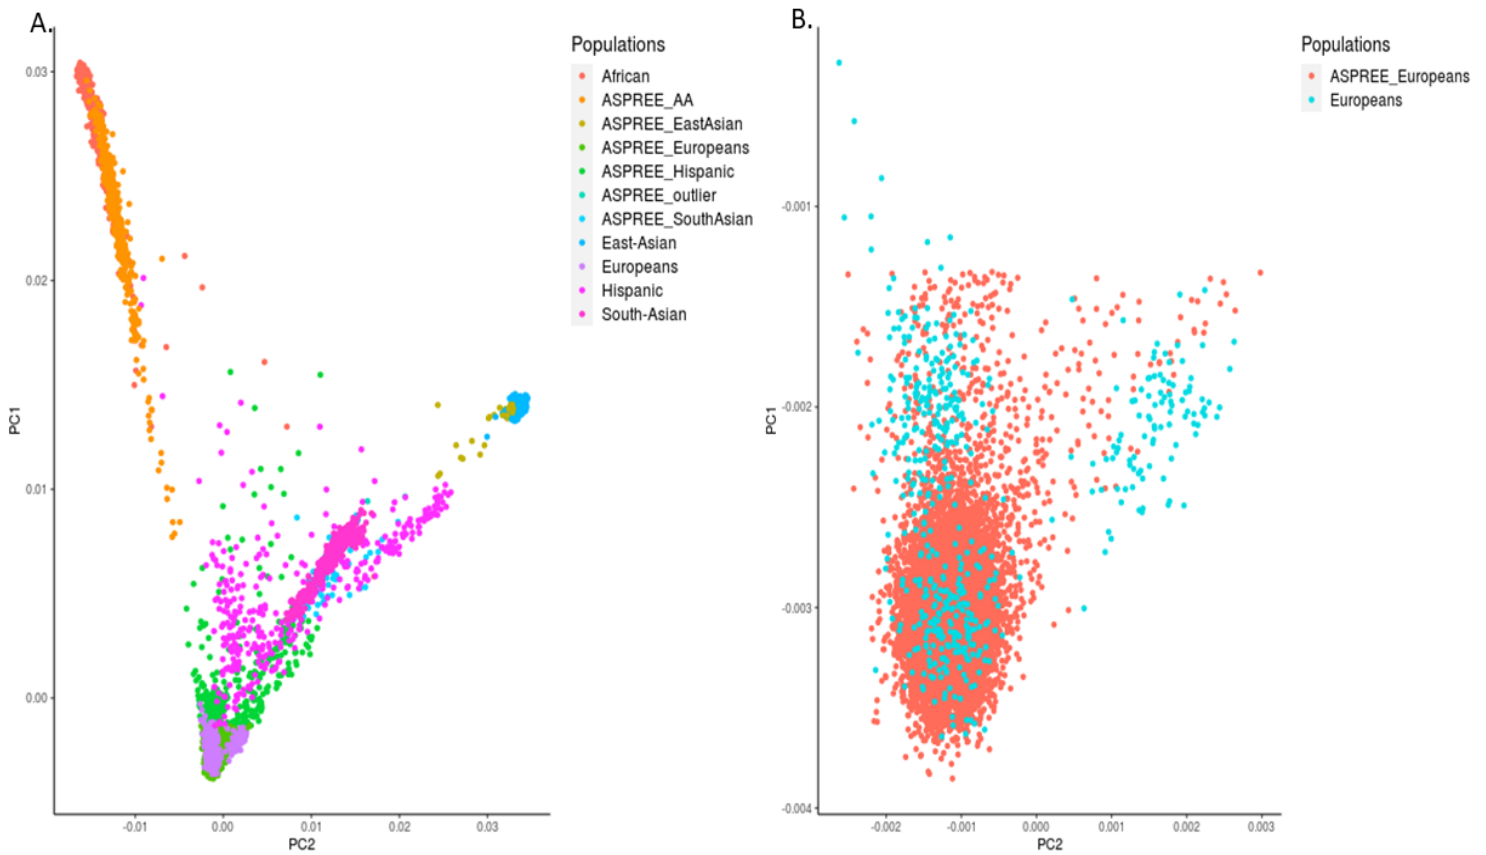

### Supplementary Figure 1: Principal component (PC) analysis of the ASPREE cohort compared with the 1,000 Genome Project.

**A)** PC plot of all genotyped ASPREE participants mapped against the 1,000 Genome population groups (Europeans, South Asians, East Asians, African American and Hispanics). (ASPREE\_AA = ASPREE participants of African American descent). **B)** PC plot of European ASPREE genotyped participants included in the PRS study mapped against the 1,000 Genome European population.

### Distribution of PRS for Melanoma

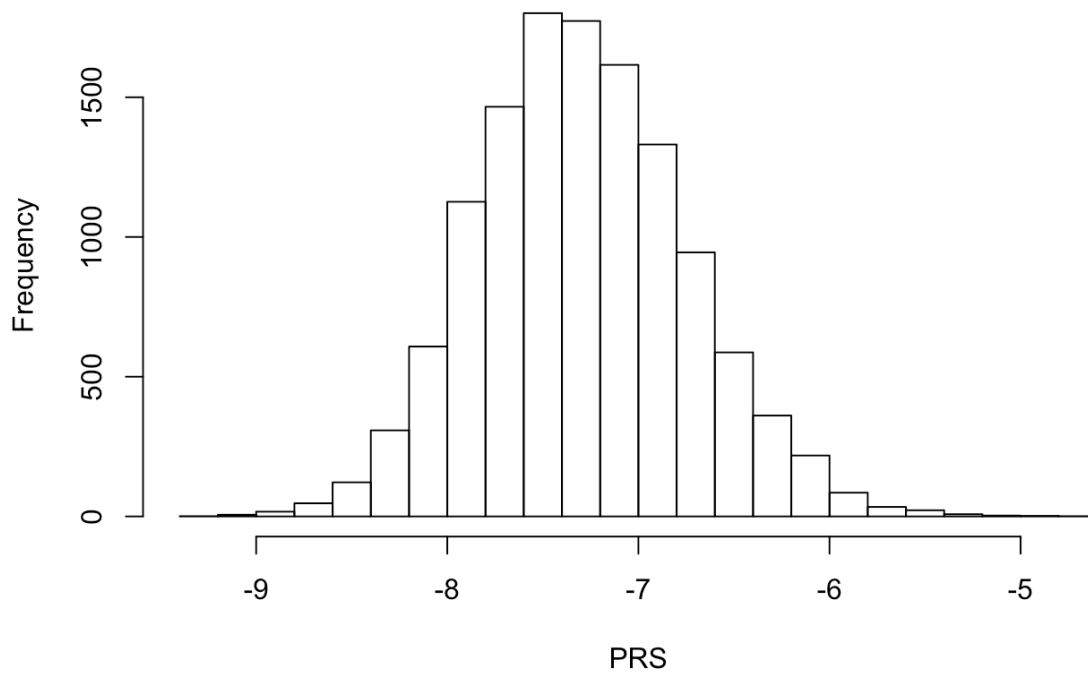

**Supplementary Figure 2: Distribution of the Polygenic Risk Score in the ASPREE study population**

PRS = polygenic risk score.

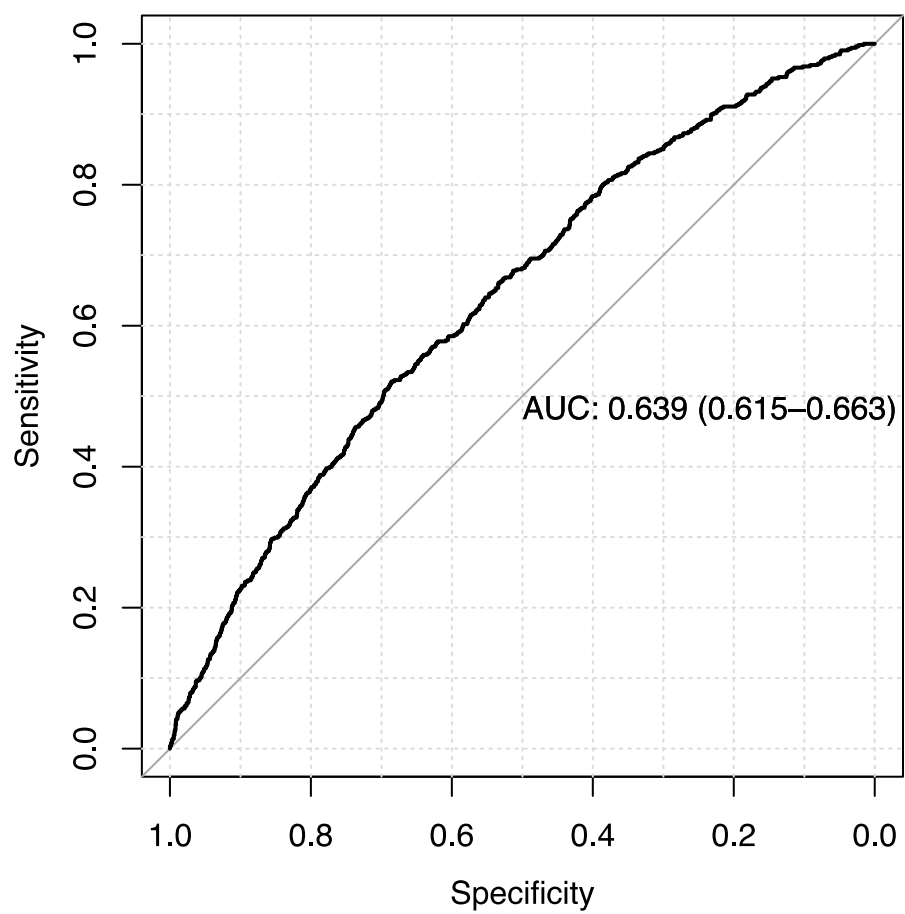

**Supplementary Figure 3: ROC curve for Prevalent Melanoma**

Area under the curve and the 95% confidence interval are shown.
